# Supplementary material for: Morphological and Chemical Diversity and Antioxidant Capacity of the Service Tree (Sorbus domestica L.) Fruits from Two Eco-Geographical Regions
Source: MDPI journal article supplement (doi:10.3390/plants10081691), 2021-08-17
Supplement: s1 [file s1]

**Table S1.** Environmental variables for seven *Sorbus domestica* populations. Acronyms of populations: P01 – Psunj; P02 – Tounj; P03 – Istria; P04 – Novi Vinodolski; P05 – Split; P06 – Brač; P07 – Konavle. Environmental variables: BIO1 = Annual Mean Temperature; BIO2 = Mean Diurnal Range (Mean of monthly (max temp - min temp)); BIO3 = Isothermality (BIO2/BIO7) ( $\times 100$ ); BIO4 = Temperature Seasonality (standard deviation  $\times 100$ ); BIO5 = Max Temperature of Warmest Month; BIO6 = Min Temperature of Coldest Month; BIO7 = Temperature Annual Range (BIO5-BIO6); BIO8 = Mean Temperature of Wettest Quarter; BIO9 = Mean Temperature of Driest Quarter; BIO10 = Mean Temperature of Warmest Quarter; BIO11 = Mean Temperature of Coldest Quarter; BIO12 = Annual Precipitation; BIO13 = Precipitation of Wettest Month; BIO14 = Precipitation of Driest Month; BIO15 = Precipitation Seasonality (Coefficient of Variation); BIO16 = Precipitation of Wettest Quarter; BIO17 = Precipitation of Driest Quarter; BIO18 = Precipitation of Warmest Quarter; BIO19 = Precipitation of Coldest Quarter.

| Pop. | bio1 | bio2 | bio3 | bio4  | bio5 | bio6 | bio7 | bio8 | bio9 | bio10 | bio11 | bio12 | bio13 | bio14 | bio15 | bio16 | bio17 | bio18 | bio19 |
|------|------|------|------|-------|------|------|------|------|------|-------|-------|-------|-------|-------|-------|-------|-------|-------|-------|
| P01  | 10.8 | 9.4  | 31.9 | 716.8 | 24.5 | -5.0 | 29.5 | 19.5 | 3.2  | 19.5  | 1.8   | 952   | 103   | 54    | 17.8  | 281   | 178   | 281   | 186   |
| P02  | 10.4 | 10.8 | 34.6 | 730.5 | 24.8 | -6.5 | 31.3 | 10.7 | 2.8  | 19.2  | 1.1   | 1255  | 136   | 75    | 18.5  | 391   | 242   | 308   | 258   |
| P03  | 12.8 | 9.2  | 32.7 | 707.5 | 26.5 | -1.7 | 28.2 | 13.1 | 5.4  | 21.8  | 4.4   | 1042  | 116   | 60    | 20.2  | 327   | 208   | 248   | 228   |
| P04  | 13.6 | 7.3  | 29.0 | 670.6 | 26.6 | 1.3  | 25.3 | 14.0 | 22.3 | 22.3  | 5.9   | 1211  | 155   | 57    | 32.1  | 450   | 228   | 228   | 280   |
| P05  | 13.6 | 8.5  | 31.4 | 695.7 | 27.9 | 0.9  | 27.0 | 9.9  | 22.6 | 22.6  | 5.6   | 827   | 107   | 34    | 28.4  | 286   | 138   | 138   | 223   |
| P06  | 15.3 | 7.0  | 27.6 | 690.4 | 28.0 | 2.8  | 25.2 | 11.7 | 24.2 | 24.2  | 7.3   | 777   | 102   | 29    | 31.2  | 275   | 119   | 119   | 221   |
| P07  | 15.8 | 7.3  | 30.6 | 621.1 | 28.1 | 4.2  | 23.9 | 13.0 | 23.8 | 23.8  | 8.8   | 1254  | 183   | 29    | 46.1  | 497   | 127   | 127   | 423   |

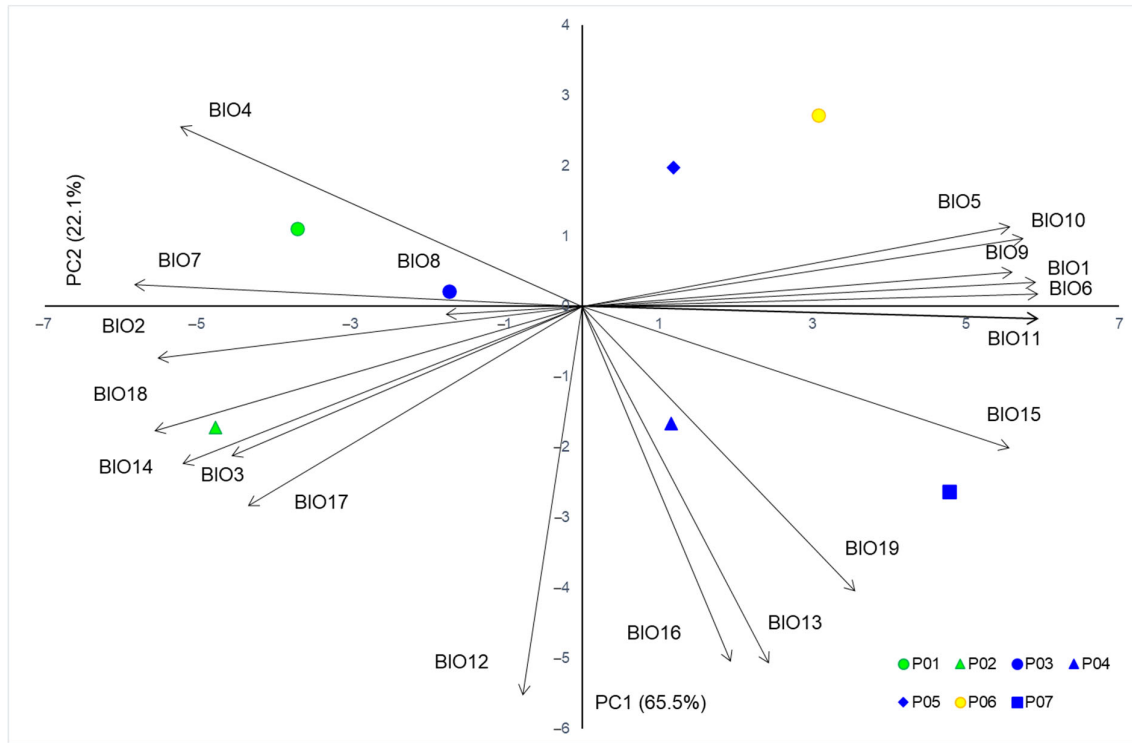

**Figure S1.** Biplot of the principal component analysis based on 19 bioclimatic variables in seven studied *Sorbus domestica* populations. Acronyms of populations: P01 (Psunj), P02 (Tounj), P03 (Istria), P04 (Novi Vinodolski), P05 (Split), P06 (Brač), and P07 (Konavle). Acronyms for environmental variables as in Table S1.

**Table S2.** Pearson's correlation coefficients between 19 bioclimatic variables and scores of the first three principal components. Acronyms for environmental variables as in Table S1.

| Environmental variables | PC—Principal Component |           |           |
|-------------------------|------------------------|-----------|-----------|
|                         | PC1                    | PC2       | PC3       |
| BIO1                    | 0.985817               | 0.041339  | -0.044234 |
| BIO2                    | -0.922173              | -0.122140 | -0.288829 |
| BIO3                    | -0.761164              | -0.321878 | -0.383230 |
| BIO4                    | -0.872703              | 0.426822  | -0.166406 |
| BIO5                    | 0.930220               | 0.172392  | -0.294272 |
| BIO6                    | 0.990758               | 0.030378  | 0.007727  |
| BIO7                    | -0.972323              | 0.052270  | -0.179615 |
| BIO8                    | -0.295793              | -0.001770 | 0.927866  |
| BIO9                    | 0.934964               | 0.082226  | -0.065905 |
| BIO10                   | 0.958224               | 0.160897  | -0.093932 |
| BIO11                   | 0.990957               | -0.028667 | -0.017851 |
| BIO12                   | -0.128451              | -0.989237 | -0.001729 |
| BIO13                   | 0.405168               | -0.911966 | 0.017329  |
| BIO14                   | -0.868277              | -0.372458 | -0.040242 |
| BIO15                   | 0.928836               | -0.336795 | 0.016881  |
| BIO16                   | 0.323219               | -0.942486 | 0.019305  |
| BIO17                   | -0.726478              | -0.472929 | -0.016479 |
| BIO18                   | -0.929885              | -0.294792 | 0.165404  |
| BIO19                   | 0.593301               | -0.758317 | -0.078756 |
| Eigenvalue              | 12.46362               | 4.205575  | 1.289686  |
| % Total Variance        | 65.59799               | 22.13461  | 6.787819  |

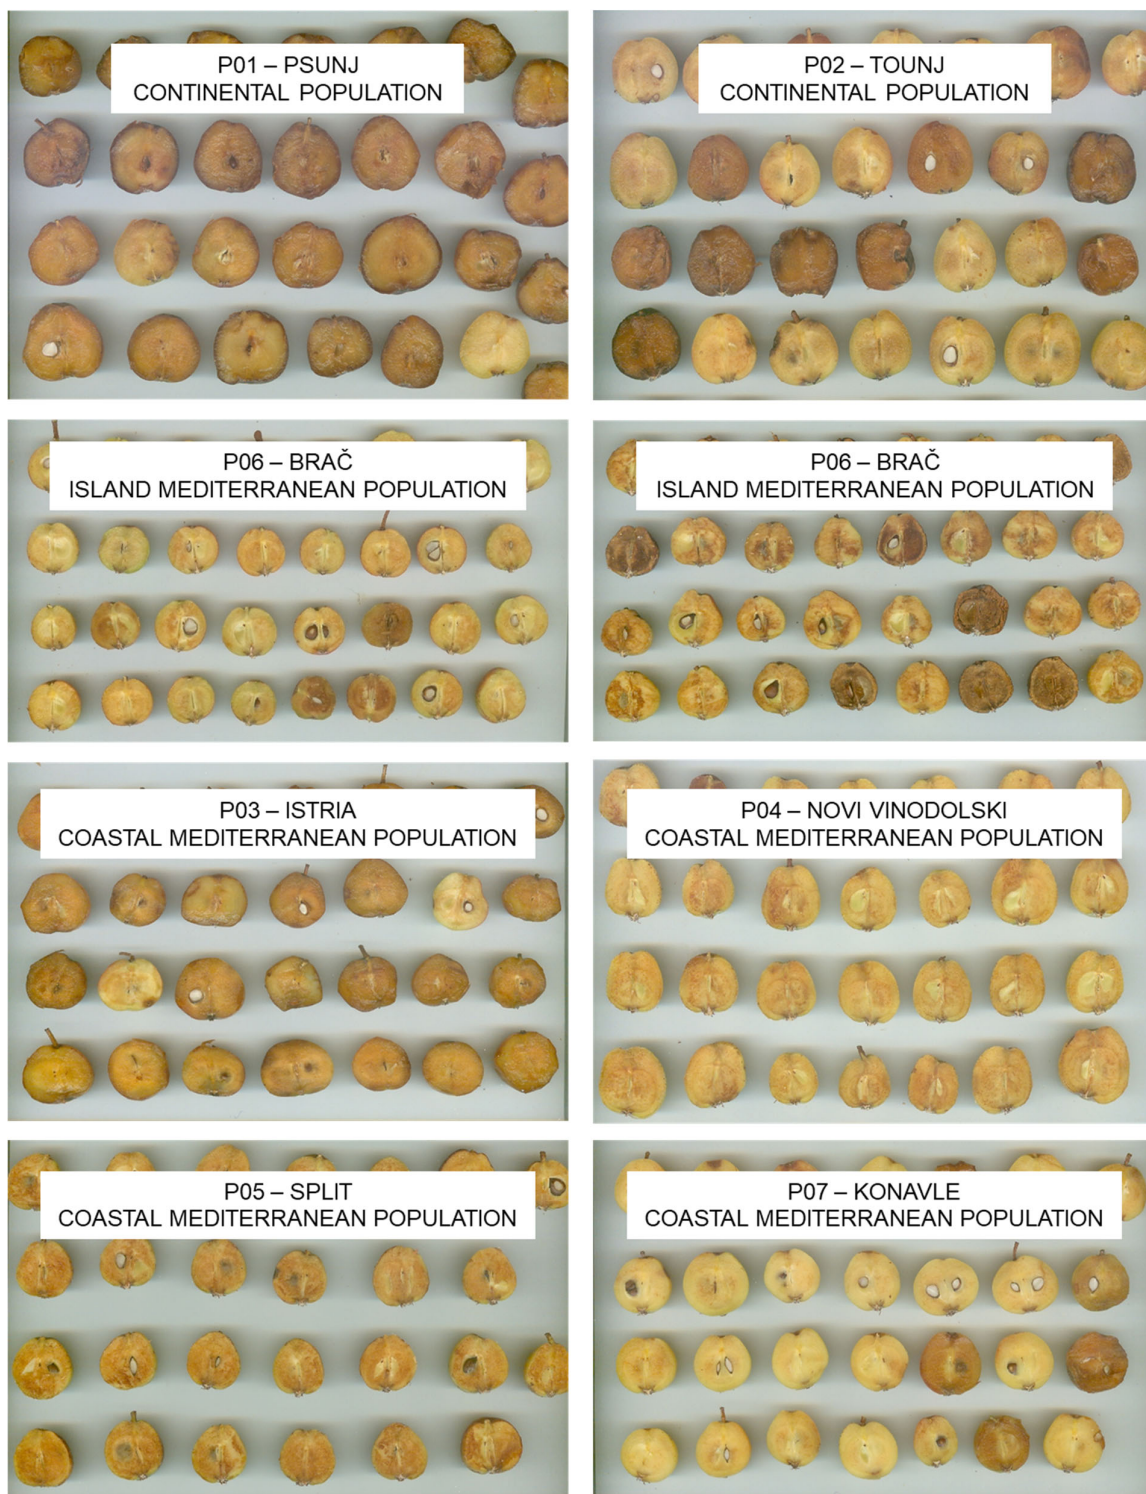

**Figure S2.** *Sorbus domestica* fruit samples from seven studied populations.

**Table S3.** Pearson's correlation coefficients between ten morphological traits and scores of the first three principal components.

| Trait                            | PC—Principal Component |           |           |
|----------------------------------|------------------------|-----------|-----------|
|                                  | PC1                    | PC2       | PC3       |
| Fruit Mass                       | -0.927652              | -0.034356 | 0.106469  |
| Fruit Length                     | -0.899328              | 0.285453  | 0.258839  |
| Maximum Fruit Width              | -0.907215              | -0.384038 | 0.098813  |
| Position of Maximum Fruit Width  | -0.883715              | 0.189022  | 0.187832  |
| Fruit Width 1                    | -0.811658              | -0.465808 | 0.108048  |
| Fruit Width 2                    | -0.807114              | -0.517059 | -0.019728 |
| Maximum Fruit Width/Fruit Length | 0.132294               | -0.938399 | -0.233767 |
| Seed Length                      | -0.612588              | 0.540219  | 0.054570  |
| Seed Width                       | -0.789985              | 0.131612  | -0.462564 |
| Number of Seeds                  | 0.565801               | -0.340882 | 0.632544  |
| Eigenvalue                       | 5.920514               | 2.056156  | 0.807143  |
| % Total Variance                 | 59.20514               | 20.56156  | 8.07143   |

**Table S4.** Pearson's correlation coefficients between ten chemical traits and scores of the first three principal components.

| Trait            | PC—Principal Component |           |           |
|------------------|------------------------|-----------|-----------|
|                  | PC1                    | PC2       | PC3       |
| Water            | -0.875312              | 0.116830  | 0.286291  |
| Crude proteins   | 0.153992               | -0.484624 | 0.069657  |
| Sugars           | -0.824995              | -0.320994 | 0.064157  |
| Ash              | 0.755234               | 0.090704  | 0.259989  |
| Crude Fat        | -0.118221              | -0.682250 | -0.195699 |
| Cellulose        | 0.776374               | 0.302306  | -0.057561 |
| Acidity          | 0.092736               | 0.105715  | 0.781612  |
| DPPH             | 0.093218               | -0.774208 | 0.210610  |
| FRAP             | -0.377734              | 0.374581  | -0.516128 |
| Total Phenols    | -0.540674              | 0.495550  | 0.312717  |
| Eigenvalue       | 3.109915               | 1.913083  | 1.219590  |
| % Total Variance | 31.09915               | 19.13083  | 12.19590  |

**Table S5.** Results of the stepwise discriminant analyses for morphometric traits.  $p(\lambda)$ , significance of Wilks'  $\lambda$ : \*\*\* significant at  $p < 0.001$ , \*\* significant at  $0.001 < p < 0.01$ , \* significant at  $0.01 < p < 0.05$ , ns non-significant values( $p > 0.05$ ).

| Trait                           | Wilks' Lambda | Partial Lambda | F-Remove  | p-Value |
|---------------------------------|---------------|----------------|-----------|---------|
| Fruit Mass                      | 0.181243      | 0.966230       | 0.664055  | ns      |
| Fruit Length                    | 0.227957      | 0.768225       | 5.732343  | **      |
| Maximum Fruit Width             | 0.185318      | 0.944985       | 1.106131  | ns      |
| Position of Maximum Fruit Width | 0.219460      | 0.797971       | 4.810396  | *       |
| Fruit Width 1                   | 0.213889      | 0.818753       | 4.206012  | *       |
| Fruit Width 2                   | 0.200534      | 0.873283       | 2.756981  | ns      |
| Seed Length                     | 0.194915      | 0.898457       | 2.147363  | ns      |
| Seed Width                      | 0.190265      | 0.920414       | 1.642887  | ns      |
| Number of Seeds                 | 0.299037      | 0.585623       | 13.444110 | ***     |

**Table S6.** Results of the stepwise discriminant analyses for chemical traits.  $p(\lambda)$ , significance of Wilks'  $\lambda$ : \*\*\* significant at  $p < 0.001$ , \*\* significant at  $0.001 < p < 0.01$ , \* significant at  $0.01 < p < 0.05$ , ns non-significant values( $p > 0.05$ ).

| Trait          | Wiks' Lambda | Partial Lambda | F-Remove  | p-Value |
|----------------|--------------|----------------|-----------|---------|
| Water          | 0.149932     | 0.577806       | 13.517690 | ***     |
| Crude Proteins | 0.089422     | 0.968793       | 0.595925  | ns      |
| Sugars         | 0.090458     | 0.957693       | 0.817260  | ns      |
| Ash            | 0.087305     | 0.992287       | 0.143804  | ns      |
| Crude Fat      | 0.118228     | 0.732748       | 6.747410  | **      |
| Cellulose      | 0.101290     | 0.855285       | 3.130210  | *       |
| Acidity        | 0.089834     | 0.964351       | 0.683881  | ns      |
| Total Phenols  | 0.090239     | 0.960018       | 0.770467  | ns      |
| DPPH           | 0.102515     | 0.845058       | 3.391977  | *       |
| FRAP           | 0.088468     | 0.979236       | 0.392285  | ns      |
